# Supplementary material for: Transcriptome-Based Identification of the Optimal Reference Genes for Quantitative Real-Time Polymerase Chain Reaction Analyses of Lingonberry Fruits throughout the Growth Cycle
Source: MDPI journal article supplement (doi:10.3390/plants12244180), 2023-12-16

**Table S3.** The melting curves of 21 candidate reference mRNA genes.

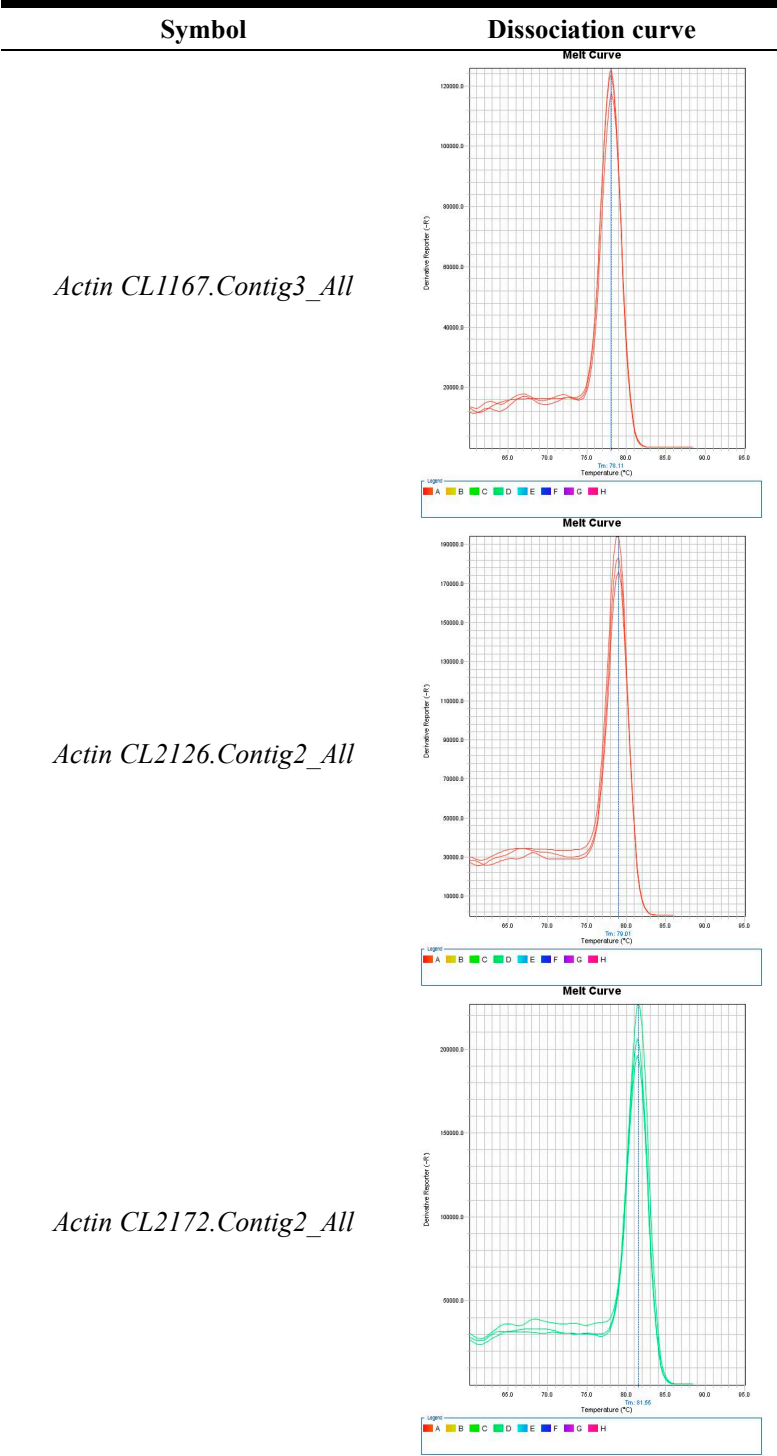

*Actin CL2172.Contig3\_All*

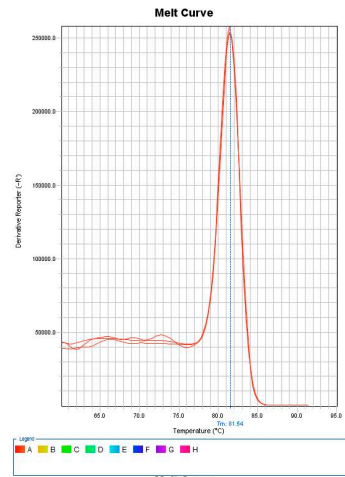

*Actin CL3559.Contig7\_All*

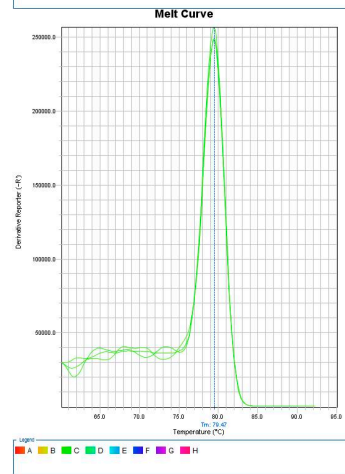

*Actin CL494.Contig13\_All*

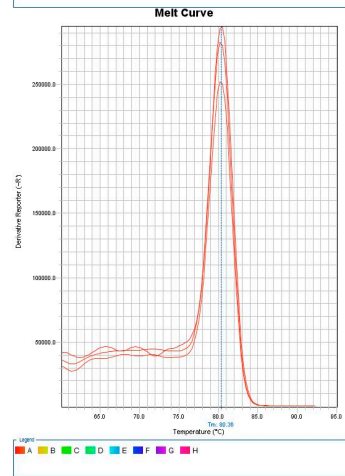

*Actin CL5740.Contig1\_All*

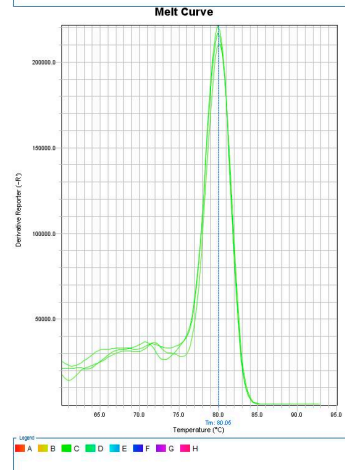

*Actin CL5740.Contig2\_All*

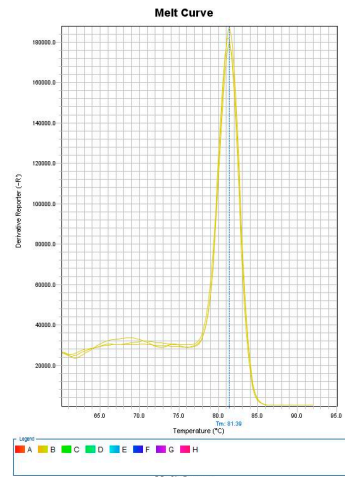

*Actin CL5740.Contig5\_All*

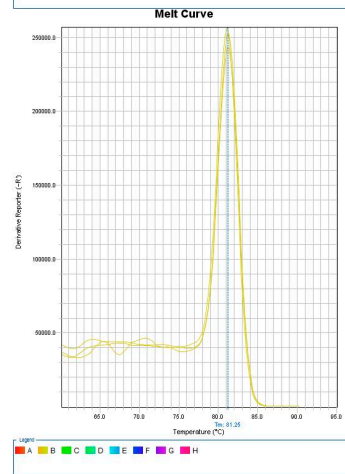

*Actin CL7856.Contig2\_All*

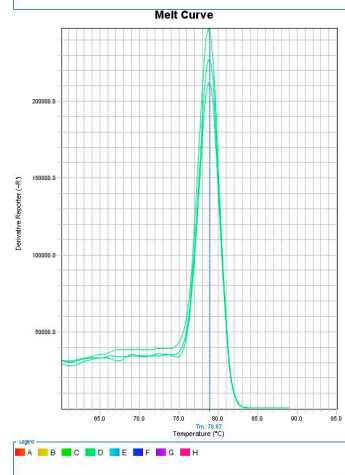

*Actin Unigene12465\_All*

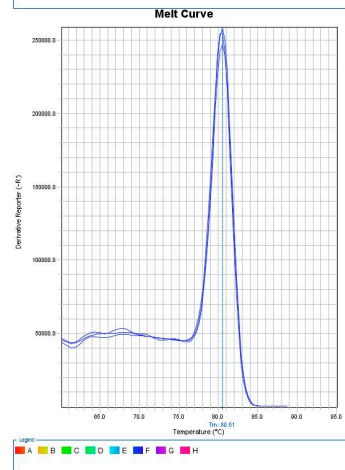

*Actin Unigene20323\_All*

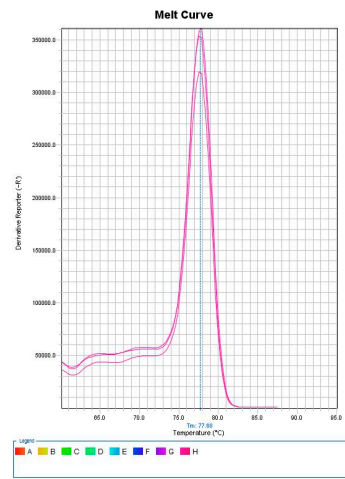

*Actin Unigene23839\_All*

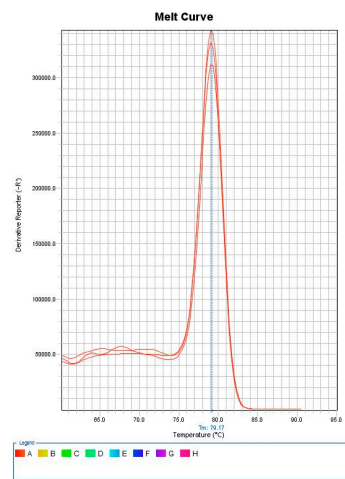

*Actin Unigene6171\_All*

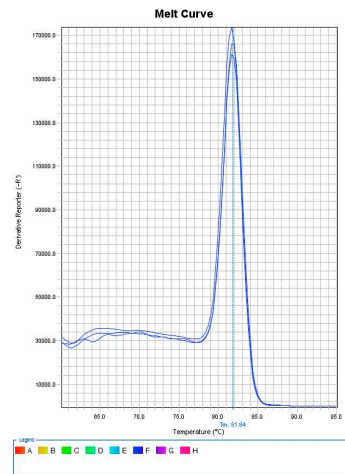

*Chy Unigene26262\_All*

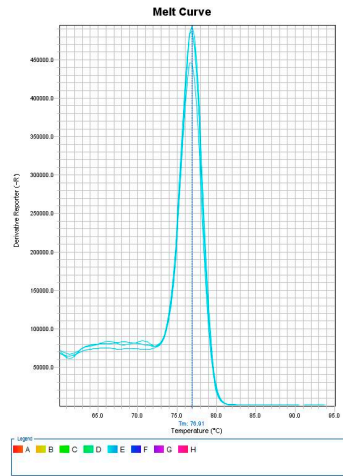

*18S rRNA CL5051.Contig1\_All*

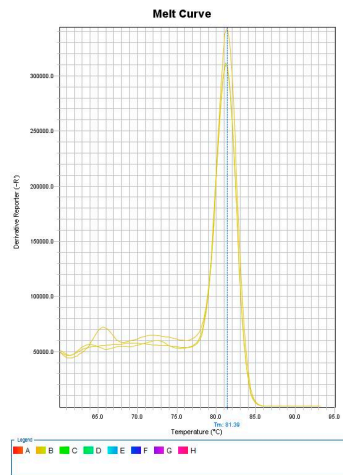

*Tub CL1466.Contig3\_All*

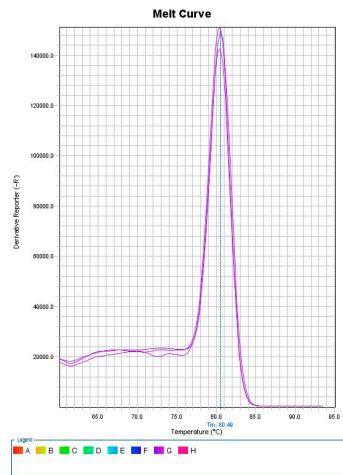

*Tub CL1466.Contig7\_All*

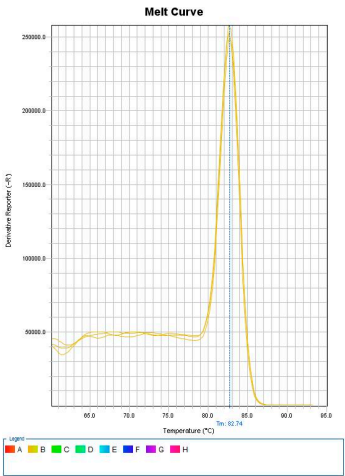

*Tub CL3192.Contig5\_All*

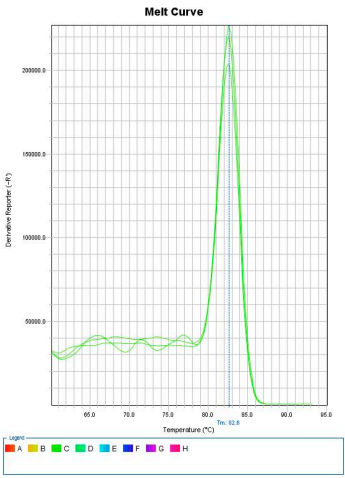

*Tub CL7489.Contig2\_All*

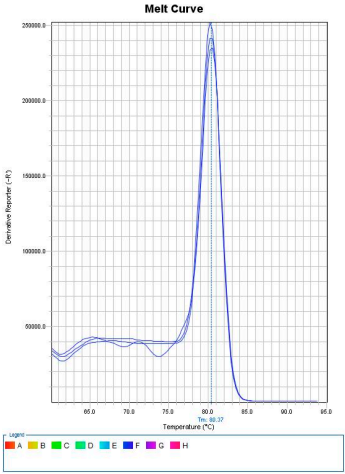

*Tub Unigene3128\_All*

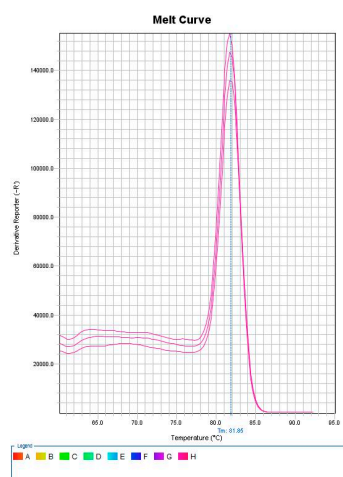

Supplement: s1 [file s1]
