# Supplementary material for: Transcriptome-Based Identification of the Optimal Reference Genes for Quantitative Real-Time Polymerase Chain Reaction Analyses of Lingonberry Fruits throughout the Growth Cycle
Source: MDPI journal article supplement (doi:10.3390/plants12244180), 2023-12-16
Supplement: s1 [file s1]

**Table S2.** Average Ct value, standard deviation (SD) and coefficient of variation (CV) of candidate internal reference genes in all lingonberry samples.

| Gene                           | Mean Ct | Standard deviation | Coefficient of variation |
|--------------------------------|---------|--------------------|--------------------------|
| <i>18S rRNA CL5051.Contig1</i> | 29.98   | 1.37               | 4.48                     |
| <i>Actin CL1167.Contig3</i>    | 28.68   | 1.44               | 5.04                     |
| <i>Actin CL2126.Contig2</i>    | 29.04   | 1.41               | 4.90                     |
| <i>Actin CL2172.Contig2</i>    | 23.29   | 0.97               | 4.22                     |
| <i>Actin CL2172.Contig3</i>    | 25.19   | 1.40               | 5.46                     |
| <i>Actin CL3559.Contig7</i>    | 30.64   | 1.10               | 3.66                     |
| <i>Actin CL494.Contig13</i>    | 27.67   | 1.26               | 4.59                     |
| <i>Actin CL5740.Contig1</i>    | 28.49   | 1.49               | 5.32                     |
| <i>Actin CL5740.Contig2</i>    | 30.34   | 1.37               | 4.58                     |
| <i>Actin CL5740.Contig5</i>    | 28.46   | 1.62               | 5.75                     |
| <i>Actin CL7856.Contig2</i>    | 32.03   | 1.33               | 4.26                     |
| <i>Actin Unigene12465</i>      | 26.96   | 0.89               | 3.28                     |
| <i>Actin Unigene20323</i>      | 31.73   | 1.08               | 3.43                     |
| <i>Actin Unigene23839</i>      | 30.79   | 1.17               | 3.87                     |
| <i>Actin Unigene6171</i>       | 31.54   | 1.22               | 3.96                     |
| <i>Chy Unigene26262</i>        | 31.76   | 1.42               | 4.56                     |
| <i>Tub CL1466.Contig3</i>      | 29.95   | 1.42               | 4.77                     |
| <i>Tub CL1466.Contig7</i>      | 32.29   | 1.06               | 3.31                     |
| <i>Tub CL3192.Contig5</i>      | 29.57   | 1.68               | 5.76                     |
| <i>Tub CL7489.Contig2</i>      | 29.55   | 2.12               | 7.36                     |
| <i>Tub Unigene3128</i>         | 29.77   | 1.28               | 4.32                     |
