# Supplementary material for: Transcriptome-Based Identification of the Optimal Reference Genes for Quantitative Real-Time Polymerase Chain Reaction Analyses of Lingonberry Fruits throughout the Growth Cycle
Source: MDPI journal article supplement (doi:10.3390/plants12244180), 2023-12-16
Supplement: s1 [file s1]

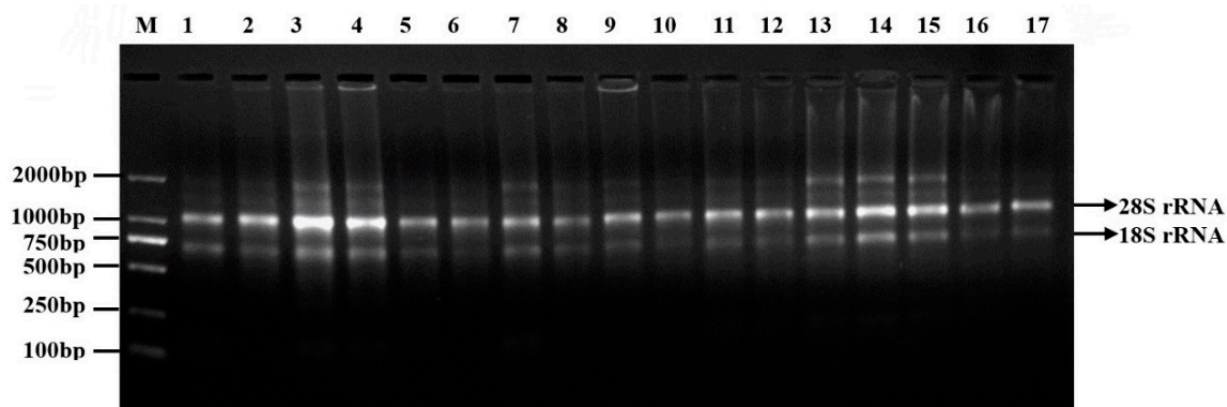

**Figure S1.** 1.2% agarose gel electrophoresis detection of total RNA extracted from lingonberry.

Note: M is 2000bp DNA Marker; 1-17 are random selection of total RNA from tested lingonberry samples.

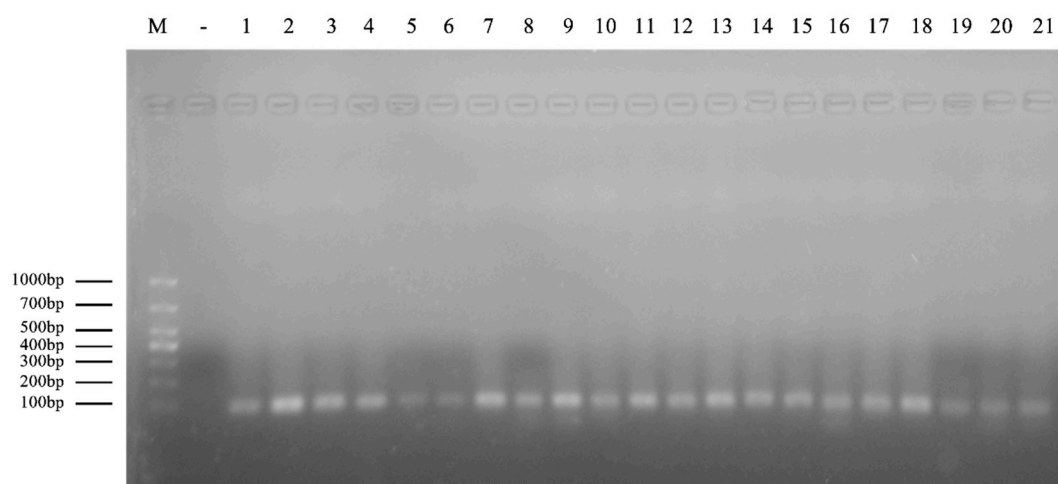

**Figure S2.** Products of qRT-PCR of 21 candidate reference genes.

Note: M: 1000bp DNA Marker; -: Negative control,

1-21: PCR Products (*Actin CL1167.Contig3\_All*, *Actin CL2126.Contig2\_All*, *Actin CL2172.Contig2\_All*, *Actin CL2172.Contig3\_All*, *Actin CL3559.Contig7\_All*, *Actin CL494.Contig13\_All*, *Actin CL5740.Contig1\_All*, *Actin CL5740.Contig2\_All*, *Actin CL5740.Contig5\_All*, *Actin CL7856.Contig2\_All*, *Actin Unigene12465\_All*, *Actin Unigene20323\_All*, *Actin Unigene23839\_All*, *Actin Unigene6171\_All*, *Chy Unigene26262\_All*, *18S rRNA CL5051.Contig1\_All*, *Tub CL1466.Contig3\_All*, *Tub CL1466.Contig7\_All*, *Tub CL3192.Contig5\_All*, *Tub CL7489.Contig2\_All*, *Tub Unigene3128\_All*.)
