# Supplementary material for: Transcriptome-Based Identification of the Optimal Reference Genes for Quantitative Real-Time Polymerase Chain Reaction Analyses of Lingonberry Fruits throughout the Growth Cycle
Source: MDPI journal article supplement (doi:10.3390/plants12244180), 2023-12-16
Supplement: s1 [file s1]

**Table S1.** Non-significantly differentially expressed genes in lingonberries among 10 candidate gene families.

| Gene         | Transcript ID             | R_FPKM  | W_FPKM  | G_FPKM   | $\log_2(R\_FPKM/$<br>G_FPKM) | $\log_2(W\_FPKM/$<br>G_FPKM) | $\log_2(R\_FPKM/$<br>W_FPKM) |
|--------------|---------------------------|---------|---------|----------|------------------------------|------------------------------|------------------------------|
|              | <i>CL1167.Contig3_All</i> | 0.8334  | 0.4411  | 0.4053   | 1.0400                       | 0.1221                       | 0.9179                       |
|              | <i>CL1395.Contig5_All</i> | 2.1298  | 2.297   | 5.5324   | -1.3772                      | -1.2682                      | -0.1090                      |
|              | <i>CL2126.Contig2_All</i> | 0.7996  | 2.0128  | 2.7986   | -1.8074                      | -0.4755                      | -1.3319                      |
|              | <i>CL2172.Contig2_All</i> | 2.3576  | 0.6851  | 0.8533   | 1.4662                       | -0.3167                      | 1.7829                       |
|              | <i>CL2172.Contig3_All</i> | 2.7502  | 1.1539  | 0.9539   | 1.5276                       | 0.2746                       | 1.2530                       |
|              | <i>CL3390.Contig4_All</i> | 1.7819  | 1.636   | 4.8493   | -1.4444                      | -1.5676                      | 0.1232                       |
|              | <i>CL3559.Contig7_All</i> | 2.0047  | 2.0123  | 4.6532   | -1.2148                      | -1.2094                      | -0.0055                      |
|              | <i>CL4378.Contig1_All</i> | 54.1388 | 39.4773 | 18.8652  | 1.5209                       | 1.0653                       | 0.4556                       |
|              | <i>CL4850.Contig2_All</i> | 9.7241  | 5.7375  | 4.4036   | 1.1429                       | 0.3817                       | 0.7611                       |
|              | <i>CL494.Contig13_All</i> | 1.0239  | 1.6169  | 3.7289   | -1.8647                      | -1.2055                      | -0.6592                      |
|              | <i>CL5229.Contig3_Al</i>  | 5.646   | 7.1462  | 11.3399  | -1.0061                      | -0.6662                      | -0.3400                      |
|              | <i>CL5740.Contig1_All</i> | 1.3244  | 0.6048  | 0.6291   | 1.0740                       | -0.0568                      | 1.1308                       |
|              | <i>CL5740.Contig2_All</i> | 0.9473  | 0.2527  | 0.4204   | 1.1721                       | -0.7343                      | 1.9064                       |
| <i>Actin</i> | <i>CL5740.Contig5_All</i> | 0.8091  | 0.2982  | 0.2511   | 1.6881                       | 0.2480                       | 1.4400                       |
|              | <i>CL6840.Contig1_All</i> | 45.6745 | 73.8838 | 113.8797 | -1.3181                      | -0.6242                      | -0.6939                      |
|              | <i>CL7185.Contig1_All</i> | 1.4962  | 3.5282  | 4.5525   | -1.6054                      | -0.3677                      | -1.2376                      |
|              | <i>CL8011.Contig1_All</i> | 4.2459  | 10.8325 | 15.6458  | -1.8816                      | -0.5304                      | -1.3512                      |
|              | <i>Unigene10648_All</i>   | 4.353   | 16.5439 | 10.9238  | -1.3274                      | 0.5988                       | -1.9262                      |
|              | <i>Unigene12465_All</i>   | 0.675   | 1.3183  | 2.107    | -1.6422                      | -0.6765                      | -0.9657                      |
|              | <i>Unigene15984_All</i>   | 31.9788 | 21.2145 | 13.5045  | 1.2437                       | 0.6516                       | 0.5921                       |
|              | <i>Unigene17936_All</i>   | 1.7729  | 2.0314  | 5.682    | -1.6803                      | -1.4839                      | -0.1964                      |
|              | <i>Unigene18404_All</i>   | 3.9142  | 10.4685 | 15.5823  | -1.9931                      | -0.5739                      | -1.4193                      |
|              | <i>Unigene20323_All</i>   | 1.032   | 2.2993  | 3.2932   | -1.6741                      | -0.5183                      | -1.1558                      |
|              | <i>Unigene22378_All</i>   | 32.1612 | 22.9379 | 15.6101  | 1.0428                       | 0.5553                       | 0.4876                       |
|              | <i>Unigene23839_All</i>   | 0.6218  | 0.7745  | 1.7724   | -1.5112                      | -1.1944                      | -0.3168                      |
|              | <i>Unigene24131_All</i>   | 5.246   | 6.798   | 12.6972  | -1.2752                      | -0.9013                      | -0.3739                      |
|              | <i>Unigene24295_All</i>   | 5.6332  | 16.2485 | 16.4857  | -1.5492                      | -0.0209                      | -1.5283                      |

**Table S1. Cont.**

| Gene         | Transcript ID             | R_FPKM   | W_FPKM   | G_FPKM   | $\log_2(R\_FPKM/$<br>G_FPKM) | $\log_2(W\_FPKM/$<br>G_FPKM) | $\log_2(R\_FPKM/$<br>W_FPKM) |
|--------------|---------------------------|----------|----------|----------|------------------------------|------------------------------|------------------------------|
| <i>Actin</i> | <i>Unigene469_All</i>     | 3.6164   | 4.6717   | 7.7875   | -1.1066                      | -0.7372                      | -0.3694                      |
|              | <i>Unigene4870_All</i>    | 125.4805 | 80.1892  | 43.7176  | 1.5212                       | 0.8752                       | 0.6460                       |
|              | <i>Unigene6171_All</i>    | 1.3973   | 2.4301   | 3.5309   | -1.3374                      | -0.5390                      | -0.7984                      |
|              | <i>Unigene7378_All</i>    | 48.4975  | 20.3828  | 13.2946  | 1.8671                       | 0.6165                       | 1.2506                       |
| <i>Tub</i>   | <i>CL1466.Contig3_All</i> | 4.9353   | 4.09     | 2.4546   | 1.0077                       | 0.7366                       | 0.2710                       |
|              | <i>CL1466.Contig7_All</i> | 1.979    | 4.7931   | 4.6206   | -1.2233                      | 0.0529                       | -1.2762                      |
|              | <i>CL1466.Contig9_All</i> | 7.5292   | 4.7383   | 3.5907   | 1.0682                       | 0.4001                       | 0.6681                       |
|              | <i>CL1656.Contig1_All</i> | 6.5721   | 2.2412   | 2.7214   | 1.2720                       | -0.2801                      | 1.5521                       |
|              | <i>CL2137.Contig1_All</i> | 4.8444   | 2.5441   | 1.2602   | 1.9427                       | 1.0135                       | 0.9292                       |
|              | <i>CL3192.Contig4_All</i> | 4.8459   | 9.5367   | 16.3973  | -1.7586                      | -0.7819                      | -0.9767                      |
|              | <i>CL3192.Contig5_All</i> | 0.419    | 0.8001   | 1.442    | -1.7831                      | -0.8498                      | -0.9332                      |
|              | <i>CL3192.Contig9_All</i> | 33.0911  | 33.517   | 8.8942   | 1.8955                       | 1.9140                       | -0.0185                      |
|              | <i>CL7163.Contig1_All</i> | 10.3902  | 7.2016   | 3.6798   | 1.4975                       | 0.9687                       | 0.5288                       |
|              | <i>CL7163.Contig2_All</i> | 6.7321   | 5.0146   | 3.3008   | 1.0282                       | 0.6033                       | 0.4249                       |
|              | <i>CL7489.Contig2_All</i> | 1.3349   | 1.7298   | 3.241    | -1.2797                      | -0.9058                      | -0.3739                      |
|              | <i>Unigene15297_All</i>   | 3.6548   | 7.0791   | 13.5818  | -1.8938                      | -0.9400                      | -0.9538                      |
|              | <i>Unigene24354_All</i>   | 22.1004  | 55.828   | 48.3005  | -1.1280                      | 0.2090                       | -1.3369                      |
|              | <i>Unigene3128_All</i>    | 2.3748   | 2.1145   | 5.1695   | -1.1222                      | -1.2897                      | 0.1675                       |
|              | <i>Unigene3627_All</i>    | 29.3621  | 31.4436  | 13.2787  | 1.1448                       | 1.2437                       | -0.0988                      |
|              | <i>Unigene6908_All</i>    | 6.5042   | 14.3043  | 15.8101  | -1.2814                      | -0.1444                      | -1.1370                      |
| <i>Tbp</i>   | <i>CL5036.Contig1_All</i> | 1.9901   | 3.3199   | 4.9984   | -1.3286                      | -0.5903                      | -0.7383                      |
| <i>Cyp</i>   | <i>CL1792.Contig2_All</i> | 5.7131   | 8.4218   | 11.8632  | -1.0542                      | -0.4943                      | -0.5599                      |
|              | <i>CL4189.Contig2_All</i> | 70.5761  | 168.8836 | 204.6606 | -1.5360                      | -0.2772                      | -1.2588                      |
|              | <i>CL6149.Contig1_All</i> | 28.0076  | 63.0056  | 57.8194  | -1.0457                      | 0.1239                       | -1.1697                      |
|              | <i>Unigene24946_All</i>   | 37.1774  | 30.5428  | 17.6026  | 1.0786                       | 0.7950                       | 0.2836                       |
|              | <i>Unigene7522_All</i>    | 30.5437  | 32.7739  | 10.8645  | 1.4913                       | 1.5929                       | -0.1017                      |
| <i>Chy</i>   | <i>Unigene26262_All</i>   | 0.9312   | 0.2635   | 0.4187   | 1.1532                       | -0.6681                      | 1.8213                       |
| <i>GAPDH</i> | <i>CL3106.Contig2_All</i> | 14.5159  | 10.8998  | 4.9859   | 1.5417                       | 1.1284                       | 0.4133                       |
|              | <i>CL403.Contig3_All</i>  | 85.651   | 56.2458  | 27.1197  | 1.6591                       | 1.0524                       | 0.6067                       |
|              | <i>CL403.Contig7_All</i>  | 25.9444  | 15.7348  | 11.4078  | 1.1854                       | 0.4639                       | 0.7215                       |
|              | <i>CL403.Contig8_All</i>  | 11.9848  | 5.2991   | 5.633    | 1.0892                       | -0.0882                      | 1.1774                       |
|              | <i>Unigene11802_All</i>   | 10.9751  | 4.6015   | 5.0877   | 1.1091                       | -0.1449                      | 1.2541                       |

**Table S1. Cont.**

| Gene                           | Transcript ID             | R_FPKM   | W_FPKM   | G_FPKM   | $\log_2(R\_FPKM/$<br>G_FPKM) | $\log_2(W\_FPKM/$<br>G_FPKM) | $\log_2(R\_FPKM/$<br>W_FPKM) |
|--------------------------------|---------------------------|----------|----------|----------|------------------------------|------------------------------|------------------------------|
| <i>GAPDH</i>                   | <i>Unigene11804_All</i>   | 29.004   | 15.3624  | 13.8181  | 1.0697                       | 0.1528                       | 0.9168                       |
| <i>18S rRNA</i>                | <i>CL5051.Contig1_All</i> | 1.5278   | 3.1211   | 4.2146   | -1.4639                      | -0.4333                      | -1.0306                      |
| <i>EF-1<math>\alpha</math></i> | <i>CL1344.Contig3_All</i> | 113.2963 | 89.4631  | 52.3921  | 1.1127                       | 0.7719                       | 0.3407                       |
|                                | <i>CL1344.Contig5_All</i> | 12.3474  | 8.6156   | 4.9415   | 1.3212                       | 0.8020                       | 0.5192                       |
| <i>EIF</i>                     | <i>CL3626.Contig1_All</i> | 4.6906   | 3.7459   | 1.5973   | 1.5541                       | 1.2297                       | 0.3245                       |
|                                | <i>CL3626.Contig2_All</i> | 8.0723   | 3.7621   | 2.1999   | 1.8755                       | 0.7741                       | 1.1014                       |
|                                | <i>CL3766.Contig1_All</i> | 53.69    | 120.916  | 192.9366 | -1.8454                      | -0.6741                      | -1.1713                      |
|                                | <i>CL3766.Contig2_All</i> | 90.8429  | 110.4604 | 269.2429 | -1.5675                      | -1.2854                      | -0.2821                      |
|                                | <i>CL4277.Contig2_All</i> | 7.2336   | 3.9381   | 2.8391   | 1.3493                       | 0.4721                       | 0.8772                       |
|                                | <i>CL6019.Contig2_All</i> | 37.5478  | 25.2233  | 17.2381  | 1.1231                       | 0.5492                       | 0.5740                       |
|                                | <i>CL6019.Contig3_All</i> | 11.2844  | 7.7127   | 5.068    | 1.1548                       | 0.6058                       | 0.5490                       |
|                                | <i>CL6910.Contig2_All</i> | 13.6323  | 27.96    | 35.3978  | -1.3766                      | -0.3403                      | -1.0363                      |
|                                | <i>Unigene1121_All</i>    | 9.53     | 14.3619  | 4.1816   | 1.1884                       | 1.7801                       | -0.5917                      |
|                                | <i>Unigene25060_All</i>   | 5.5034   | 12.3342  | 14.4752  | -1.3952                      | -0.2309                      | -1.1643                      |
|                                | <i>Unigene4669_All</i>    | 7.0338   | 10.0275  | 14.5361  | -1.0473                      | -0.5357                      | -0.5116                      |
